# Supplementary material for: Fungal literature records database of the sub-Antarctic Region of Aysén, Chile
Source: Biodivers Data J. 2021 Dec 29;9:e75951. doi: 10.3897/BDJ.9.e75951 (PMC8732883; doi:10.3897/BDJ.9.e75951)
Supplement: Supplementary material 1 — Number of records (Nº R.) of each lichen species. [file bdj-09-e75951-s001.csv]

LICHENS SPECIES	NºR
Alectoria nigricans (Ach.) Nyl., 1861	2
Alectoria ochroleuca (Hoffm.) A. Massal., 1855	2
Amandinea punctata (Hoffm.) Coppins & Scheid., 1993	1
Anzia afromontana R. Sant., 1986	2
Anzia wilsonii Räsänen, 1944	7
Austromelanelixia subglabra (Räsänen) Divakar, Crespo & Lumbsch, 2017	3
Bacidina pallidocarnea (Müll. Arg.) V?zda, 1991	1
Baeomyces symphycarpus Ach., 1803	2
Bibbya bullata (Meyen & Flot.) Kistenich, Timdal, Bendiksby & S. Ekman, 2018	2
Bryoria chalybeiformis (L.) Brodo & D. Hawksw., 1977	3
Bunodophoron australe (Laurer) A. Massal., 1861	5
Bunodophoron dodgei (Ohlsson) Wedin, 1993	5
Bunodophoron imshaugii (Ohlsson) Wedin, 1993	4
Bunodophoron insigne (Laurer) Wedin, 1993	5
Bunodophoron patagonicum (C.W. Dodge) Wedin, 1993	3
Bunodophoron ramuliferum (I.M. Lamb) Wedin, 1993	2
Bunodophoron scrobiculatum (C. Bab.) Wedin, 1993	1
Bunodophoron tibellii (Wedin) Wedin, 1993	1
Bunodophoron whakapapaense (Wedin) Wedin, 1993	4
Calopadia fusca (Müll. Arg.) Vezda, 1986	1
Caloplaca altoandina (Malme) Zahlbr., 1931	1
Caloplaca regalis (Vain.) Zahlbr., 1931	2
Caloplaca sublobulata (Nyl.) Zahlbr., 1931	1
Caloplaca Th. Fr., 1860	2
Candelariella vitellina (Ehrh.) Müll. Arg., 1894	1
Cenomyce sarmentosa Hook. f. & Taylor, 1844	2
Cenomyce ustulata Hook. f. & Taylor, 1844	3
Cetraria aculeata (Schreb.) Fr., 1826	2
Chlorea malacea Stirt., 1883	11
Chrysothrix candelaris (L.) J.R. Laundon, 1981	1
Cladia aggregata (Sw.) Nyl., 1870	3
Cladia schizopora (Nyl.) Nyl., 1888	1
Cladonia anserina Ahti, 1992	1
Cladonia bellidiflora (Ach.) Schaer., 1823	1
Cladonia borealis S. Stenroos, 1989	1
Cladonia cariosa (Ach.) Spreng., 1827	3
Cladonia carneola (Fr.) Fr., 1831	2
Cladonia carneola var. bacilliformis Nyl. (?)	1
Cladonia chlorophaea (Flörke ex Sommerf.) Spreng., 1827	4
Cladonia confragosa S. Stenroos, 1996	1
Cladonia corniculata Ahti & Kashiw., 1984	1
Cladonia fimbriata (L.) Fr., 1831	2
Cladonia furcata var. Farinacea Vain. 1887	2
Cladonia gracilis subsp. valdiviensis Ahti, 1990	1
Cladonia gracilis var. gracilis (?)	2
Cladonia lepidophora Ahti & Kashiw., 1984	2
Cladonia macilenta Hoffm., 1796	1
Cladonia norvegica Tønsberg & Holien, 1984	1
Cladonia ochrochlora Flörke, 1895	2
Cladonia P. Browne, 156	1
Cladonia phyllophora Ehrh. ex Hoffm., 1796	1
Cladonia pileata Mont., 1852	1
Cladonia pocillum (Ach.) O.J. Rich., 1803	1
Cladonia pycnoclada (Pers.) Nyl., 1867	4
Cladonia pyxidata (L.) Hoffm., 1796	4
Cladonia rangiferina (L.) Weber ex FH. Wigg., 1780	1
Cladonia rangiferina (L.) Weber, 1780	2
Cladonia robbinsii A. Evans, 1944	1
Cladonia scabriuscula (Delise) Nyl., 1875	2
Cladonia squamosa (Scop.) Hoffm., 1796	2
Cladonia subchordalis A. Evans, 1955	1
Cladonia subsquamosa Kremp., 1873	2
Cladonia subsquamosa var. granulosa Vain. (?)	1
Cladonia subsubulata Nyl., 1876	2
Cladonia sylvatica var. Laevigata Vain., 1887	1
Cladonia tessellata Ahti & Kashiw., 1984	1
Coccocarpia domingensis Vain., 1915	1
Coccocarpia erythroxyli (Spreng.) Swinscow & Krog, 1976	1
Coccocarpia palmicola (Spreng.) Arv. & D.J. Galloway, 1979	3
Coccotrema coccophorum (Mont.) I. Schmitt, Messuti & Lumbsch, 2001	6
Coccotrema cucurbitula (Mont.) Müll. Arg., 1889	3
Coelopogon epiphorellus (Nyl.) Brusse & Kärnefelt, 1991	4
Coenogonium luteum (Dicks.) Kalb & Lücking, 2000	1
Collema australe Hook. f. & Taylor, 1844	2
Collema glaucophthalmum Nyl., 1858	2
Cora glabrata (Spreng.) Fr., 1838	5
Cyanisticta hirsuta (Mont.) Räsänen, 1936	6
Cyanisticta piloselloides Räsänen, 1932	3
Degelia duplomarginata (P. James & Henssen) Arv. & D.J. Galloway, 1981	1
Degelia flabellata P.M. Jørg. & P. James, 1990	1
Degelia gayana (Mont.) Arv. & D. J. Galloway, 1981	1
Degeliella versicolor (Müll. Arg.) P.M. Jørg. & H.L. Andersen, 2015	2
Dictyonema glabratum (Spreng.) D. Hawksw., 1988	1
Erioderma leylandii (Taylor) Müll. Arg., 1888	9
Erioderma sorediatum D.J. Galloway & P.M. Jørg., 1975	3
Fellhanera dominicana (Vain.) V?zda, 1986	1
Flavoparmelia caperata (L.) Hale, 1986	2
Flavoparmelia gerlachei (Zahlbr.) Hale, 1986	1
Flavoparmelia soredians (Nyl.) Hale, 1986	1
Fuscopannaria minor (Darb.) P.M. Jørg., 1999	1
Fuscopannaria subimmixta (C. Knight) P.M. Jørg., 1999	1
Hispidopannaria hispidula (Nyl.) Elvebakk, S.G. Hong & C.H. Park, 2020	2
Hydropunctaria maura (Wahlenb.) C. Keller, Gueidan & Thüs, 2009	1
Hypogymnia bitteri (Lynge) Ahti, 1964	2
Hypogymnia lugubris (Pers.) Krog, 1968	2
Hypogymnia subphysodes (Kremp.) Filson, 1970	1
Hypogymnia subphysodes var. subphysodes Filson, 1970	8
Hypotrachyna laevigata (Sm.) Hale, 1975	3
Hypotrachyna livida (Taylor) Hale, 1975	1
Hypotrachyna oostingii (J.P. Dey) Hale, 1975	1
Hypotrachyna physcioides (Nyl.) Hale, 1975	1
Hypotrachyna rockii (Zahlbr.) Hale, 1975	1
Hypotrachyna sinuosa (Sm.) Hale, 1975	6
Hypotrachyna sorocheila (Vainio) Divakar, A. Crespo, Sipman, Elix & Lumbsch, 2013	3
Jackelixia ligulata (Körb.) S.Y. Kondr., Fedorenko, S. Stenroos, Kärnefelt & A. Thell, 2009	1
Lecanora argentata (Ach.) Malme, 1897	1
Lecanora aspidophora Vain., 1903	2
Lecanora broccha Nyl., 1876	1
Lecanora perrugosa Nyl., 1865	3
Lecanora stenophylla Hue, 1914	2
Lecidea fuscoatrula Nyl., 1888	1
Leifidium tenerum (Laurer) Wedin, 1993	12
Leioderma pycnophorum Nyl., 1888	6
Lepolichen coccophorus (Mont.) Trevis., 1853	2
Lepra dactylina (Ach.) Hafellner, 2016	1
Leptogium azureum (Sw.) Mont., 1840	3
Leptogium brebissonii Mont., 1840	1
Leptogium britannicum P.M. Jørg. & P. James, 1983	2
Leptogium cochleatum (Dicks.) P.M. Jørg. & P. James, 1983	1
Leptogium coralloideum (Meyen & Flot.) Vain., 1915	4
Leptogium cyanescens (Ach.) Körb., 1855	3
Leptogium decipiens P.M. Jørg., 1995	2
Leptogium juressianum Tav., 1950	5
Leptogium laceroides de Lesd., 1933	2
Leptogium malmei P.M. Jørg., 1975	3
Leptogium menziesii (Sm.) Mont., 1852	2
Leptogium phyllocarpum (Pers.) Mont., 1848	1
Leptogium valdivianum M. Lindstr., 1996	1
Lichen chrysoleucus Sm., 1791	2
Lichen elongatus Wulfen, 1781	3
Lichen furcatus Huds. 1762	2
Lichen ramulosus Sw., 1788	8
Mastodia tessellata (Hook. f. & Harv.) Hook. f. & Harv., 1847	1
Mazosia phyllosema (Nyl.) Zahlbr., 1923	1
Melanohalea ushuaiensis (Zahlbr.) O. Blanco, A. Crespo, Divakar, Essl., D. Hawksw. & Lumbsch, 2004	2
Menegazzia albida (Zahlbr.) R. Sant., 1942	3
Menegazzia chrysogaster Bjerke & Elvebakk, 2001	10
Menegazzia cincinnata (Ach.) Bitter, 1901	2
Menegazzia dispora (Nyl.) R. Sant, 1942	2
Menegazzia fumarprotocetrarica Calvelo & Adler, 1996	9
Menegazzia globulifera R. Sant., 1942	13
Menegazzia hollermayeri (Räsänen) R. Sant., 1942	1
Menegazzia kawesqarica Bjerke & Elvebakk, 2001	4
Menegazzia magellanica R. Sant., 1942	1
Menegazzia neozelandica (Zahlbr.) P. James, 1992	10
Menegazzia norsorediata Adler & Calvelo, 1996	8
Menegazzia opuntioides (Müll.Arg.) R.Sant., 1942	1
Menegazzia sanguinascens (Räsänen) R. Sant., 1942	10
Menegazzia sanguinascens (Räsänen) R.Sant., 1942	1
Menegazzia subpertusa P. James & D.J. Galloway, 1983	6
Menegazzia tenuis R. Sant., 1942	2
Menegazzia wandae Bjerke, 2001	7
Metus efflorescens D.J. Galloway & P. James, 1987	1
Myriolecis dispersa (Pers.) ?liwa, Zhao Xin & Lumbsch, 2015	1
Nephroma antarcticum (Wulfen) Nyl., 1860	1
Nephroma antarcticum f. antarcticum (?)	9
Nephroma australe A.Rich., 1832	1
Nephroma cellulosum (Sm.) Ach., 1810	7
Nephroma cellulosum var. isidioferum J.S. Murray, 1960	2
Nephroma chubutense I.M. Lamb, 1955	1
Nephroma kuehnemannii I.M. Lamb, 1955	1
Nephroma lobuligerum (Müll. Arg.) Gyeln., 1930	1
Nephroma lyallii f. isidiatum Js. Murray, 1960	1
Nephroma microphyllum Henssen, 1978	3
Nephroma parile (Ach.) Ach., 1810	2
Nephroma plumbeum (Mont.) Mont., 1852	1
Nephroma plumbeum var. plumbeum (?)	2
Nephroma skottsbergii F.J. White & P. James, 1988	2
Nephromium pseudoparile Räsänen, 1936	4
Nephromopsis chlorophylla (Willd.) Divakar, Crespo & Lumbsch, 2017	3
Neuropogon poeppigii Nees & Flot., 1835	2
Neuropogon subantarcticus (F.J. Walker) D.J. Galloway & Quilhot, 1998	1
Normandina pulchella (Borrer) Nyl., 1861	3
Ochrolechia pallescens (L.) A. Massal., 1853	2
Opisteria analogica (Nyl.) Vain., 1909	1
Pannaria calophylla (Müll.Arg.) Passo & Calvelo, 2006	1
Pannaria conoplea (Ach.) Bory, 1828	3
Pannaria Delise ex Bory, 1828	1
Pannaria farinosa Elvebakk & Fritt-Rasmussen, 2007	3
Pannaria implexa (Stirt.) Passo, Calvelo & S. Stenroos, 2008	1
Pannaria sphinctrina (Mont.) Tuck. ex Hue, 1902	4
Pannaria tavaresii P.M. Jørg., 1978	1
Pannoparmelia angustata (Pers.) Zahlbr., 1930	2
Parasiphula complanata (Hook. f. & Taylor) Kantvilas & Grube, 2006	1
Parmelia angustata Pers., 1827	5
Parmelia antarctica Vain., 1903	1
Parmelia brevirhiza Kurok. 1964	4
Parmelia cincinnata Ach., 1803	6
Parmelia cunninghamii Cromb., 1876	7
Parmelia dispora Nyl., 1876	2
Parmelia flavovirens Kurok., 1964	1
Parmelia gerlachei Zahlbr., 1929	1
Parmelia hollermayeri Räsänen, 1937	10
Parmelia megalospora Räsänen, 1932	1
Parmelia mundata Nyl., 1860	2
Parmelia neozelandica Zahlbr., 1930	1
Parmelia oostingii J.P. Dey, 1974	1
Parmelia opuntioides Müll. Arg., 1889	5
Parmelia opuntioides var. violascens Räsänen, 1932	3
Parmelia protosulcata Hale, 1982	5
Parmelia pulchrilobata Bitter, 1901	1
Parmelia rachista Hale, 1972	1
Parmelia saxatilis (L.) Ach., 1803	4
Parmelia subphysodes Kremp., 1881	1
Parmelia sulcata Taylor, 1836	3
Parmelia turgidula Bitter, 1901	2
Parmelia ulcerosa Zahlbr., 1931	2
Parmelia valdiviensis Räsänen, 1937	5
Parmeliella duplomarginata P. James & Henssen, 1980	4
Parmeliella nigrocincta (Mont.) Müll. Arg., 1881	2
Parmeliopsis hyperopta (Ach.) Vain., 1881	1
Parmotrema perlatum (Huds.) M. Choisy, 1952	2
Parmotrema reticulatum (Taylor) M. Choisy, 1952	1
Patellaria foliacea var. arbuscula Wallr. (?)	1
Peltigera australis (A. Rich.) Mont., 1835	2
Peltigera canina (L.) Wild, 1787	3
Peltigera collina (Ach.) Schrad., 1801	2
Peltigera didactyla (With.) J.R. Laundon, 1984	3
Peltigera frigida R. Sant, 1944	1
Peltigera lepidophora (Nyl.) Bitter, 1904	2
Peltigera membranacea (Ach.) Nyl., 1887	1
Peltigera polydactylon (Neck.) Hoffm., 1789	3
Peltigera praetextata (Flörke ex Sommerf.) Zopf, 1909	1
Peltigera pulverulenta Taylor, 1860	1
Peltigera rufescens (Weiss) Humb., 1793	2
Peltigera scabrosa Th. Fr., 1860	4
Peltigera ulcerata Müll. Arg., 1880	1
Peribotryon pavonii Dufour ex Fr., 1832	2
Phaeographis patagonica Zahlbr., 1908	1
Phaeorrhiza nimbosa (Fr.) H. Mayrhofer & Poelt, 1979	2
Phlyctis chilensis D.J. Galloway & Guzmán, 1988	5
Phormopsora isabellina (Vain.) Elvebakk, S.G. Hong & C.H. Park, 2020	3
Physcia (Schreb.) Michx., 1803	2
Physcia adscendens (Fr.) H. Olivier, 1882	1
Physcia caesia (Hoffm.) Hampe ex Fürnr., 1839	2
Physconia muscigena (Ach.) Poelt, 1965	1
Physconia perisidiosa (Erichsen) Moberg, 1977	2
Placopsis baculigera I.M. Lamb, 1947	1
Placopsis cribellans (Nyl.) Räsänen, 1940	1
Placopsis cribellans f. tuberculifera I.M. Lamb, 1947	1
Placopsis fuscidula I.M. Lamb ex Räsänen, 1939	2
Placopsis lambii Hertel & V. Wirth, 1987	1
Placopsis parellina (Nyl.) I.M. Lamb, 1940	1
Placopsis parellina f. subcribellans I.M. Lamb, 1947	1
Placopsis pycnotheca I.M. Lamb ex Räsänen, 1939	1
Platismatia glauca (L.) W.L. Culb. & C.F. Culb., 1968	3
Podostictina berberina (G. Forst.) Moncada & Lücking, 2015	7
Podostictina compar (Nyl.) Moncada & Lücking, 2015	4
Podostictina encoensis (R. Sant.) D.J. Galloway & de Lange, 2017	6
Podostictina endochrysa (Delise) D.J. Galloway & de Lange, 2017	1
Podostictina flavicans (Hook. f. & Taylor) Moncada & Lücking, 2015	4
Podostictina scabrosa (R. Sant.) D.J. Galloway & de Lange, 2017	4
Podostictina vaccina (Mont.) D.J. Galloway & de Lange, 2017	2
Polycauliona candelaria (L.) Frödén, Arup & Søchting, 2013	4
Polychidium contortum Henssen, 1963	1
Protousnea magellanica (Mont.) Krog, 1976	8
Protousnea poeppigii (Nees & Flot.) Krog, 1976	1
Protousnea teretiuscula Krog, 1976	2
Pseudephebe pubescens (L.) M. Choisy, 1930	2
Pseudocyphellaria bartlettii D.J. Galloway, 1985	1
Pseudocyphellaria berberina (G.Forster) D.J.Galloway & P.James, 1977	1
Pseudocyphellaria coriifolia (Müll. Arg.) Malme, 1899	5
}Pseudocyphellaria crocata (L.) Vain., 1898	11
Pseudocyphellaria dasyphyllidia Bjerke, 2003	1
Pseudocyphellaria dissimilis (Nyl.) D.J. Galloway & P. James, 1980	2
Pseudocyphellaria divulsa (Taylor) Imshaug, 1977	8
Pseudocyphellaria dubia Du Rietz, 1926	5
Pseudocyphellaria encoensis R. Sant., 1989	1
Pseudocyphellaria exanthematica I.M. Lamb, 1955	2
Pseudocyphellaria faveolata (Delise) Malme, 1899	4
Pseudocyphellaria gilva (Ach.) Malme, 1899	2
Pseudocyphellaria glabra (Hook. f. & Taylor) C.W. Dodge, 1948	8
Pseudocyphellaria granulata (C. Bab.) Malme, 1899	2
Pseudocyphellaria guillemini (Mont.) D.J. Galloway, 1986	1
Pseudocyphellaria hillii (C.W. Dodge) D.J. Galloway, 1992	1
Pseudocyphellaria intricata (Delise) Vain., 1898	7
Pseudocyphellaria lechleri (Müll. Arg.) Du Rietz, 1940	1
Pseudocyphellaria mallota (Tuck.) H. Magn., 1940	4
Pseudocyphellaria malmeana D.J. Galloway, 1992	2
Pseudocyphellaria neglecta (Müll. Arg.) H. Magn., 1940	3
Pseudocyphellaria norvegica (Gyeln.) P. James, 1979	2
Pseudocyphellaria obvoluta (Sw.) Malme, 1899	2
Pseudocyphellaria pilosella Malme, 1899	5
Pseudocyphellaria piloselloides (Räsänen) H. Magn., 1940	1
Pseudocyphellaria pluvialis R. Sant., 1986	3
Pseudocyphellaria redonii D.J. Galloway, 1992	1
Pseudocyphellaria santessonii D.J. Galloway, 1986	2
Pseudocyphellaria scabrosa R. Sant., 1986	1
Pseudocyphellaria subrubella Räsänen, 1939	1
Pseudocyphellaria wandae D.J. Galloway, 1992	1
Psoroma calophyllum Müll. Arg., 1892	2
Psoroma cinnamomeum Malme, 1925	3
Psoroma echinaceum P.M. Jørg. & Wedin, 1999	1
Psoroma fruticulosum P. James & Henssen, 1983	2
Psoroma hypnorum (Vahl) Gray, 1821	2
Psoroma paleaceum (Fr.) Timdal & Tønsberg, 2007	1
Psoroma pallidum Nyl., 1869	3
Psoroma sphinctrinum var. microphyllizans Nyl., 1869	2
Psoroma tenue Henssen, 1981	2
Psorophorus pholidotus (Mont.) Elvebakk, 2010	2
Punctelia borreri (Sm.) Krog, 1982	1
Rhizocarpon atrobrunneum DC., 1805	1
Rhizocarpon disporum (Nägeli ex Hepp) Müll. Arg., 1879	1
Rhizocarpon geographicum (L.) DC., 1805	4
Rhizocarpon grande (Flörke ex Flot.) Arnold, 1871	4
Rhizocarpon lecanorinum Anders, 1924	2
Rhizocarpon superficiale (Schaer.) Malme, 1914	2
Rhizoplaca melanophthalma (DC.) Leuckert, 1977	3
Rhymbocarpus neglectus (Vain.) Diederich & Etayo, 2000	1
Rinodina olivaceobrunnea C.W. Dodge & G.E. Baker, 1938	1
Rusavskia elegans (Link) S.Y. Kondr. & Kärnefelt, 2003	1
Santessoniella Henssen, 1997	1
Scyphophorus didymus Fée (?)	1
Sphaerophorus globosus (Huds.) Vain., 1903	2
Sphaerophorus polycarpon Colenso, 1884	1
Stereocaulon alpinum Laurer, 1827	1
Stereocaulon alpinum var. glabrum Müll. Arg., 1889	2
Stereocaulon corticatulum Nyl. 1858	1
Stereocaulon implexum Th. Fr., 1857	1
Stereocaulon ramulosum Raeusch., 1797	1
Stereocaulon tomentosum Fr., 1825	1
Stereocaulon vesuvianum Pers., 1811	2
Sticta ainoae D.J. Galloway & J. Pickering, 1990	5
Sticta caulescens De Not., 1851	1
Sticta coerulescens Mont., 1852	4
Sticta coriifolia var. nudata Zahlbr., 1931	3
Sticta fuliginosa (Dicks.) Ach., 1803	7
Sticta gaudichaldia Delise (1825)	1
Sticta gaudichaldia Delise, 1825	1
Sticta hypochra Vain., 1903	5
Sticta limbata (Sm.) Ach., 1803	2
Sticta longipes (Müll. Arg.) Malme, 1899	1
Sticta nitida Taylor, 1847	6
Sticta santessonii D.J. Galloway, 1944	2
Sticta sublimbata (J. Steiner) Swinscow & Krog, 1983	3
Sticta valdiviana Nyl., 1895	3
Sticta weigelii (Ach.) Vain., 1810	2
Stictina caulescens (De Not.) Räsänen, 1932	6
Stictina hypochra (Vain.) C.W.Dodge, 1965	1
Stictina longipes Müll. Arg., 1882	2
Stictina meyenii Trevis, 1869	2
Stictina weigelii (Ach.) Stizenb., 1895	2
Tapellaria epiphylla (Müll. Arg.) R. Sant., 1952	1
Tephromela atra (Huds.) Hafellner, 1983	3
Thalloidima sedifolium (Scop.) Kistenich, Timdal, Bendiksby & S. Ekman, 2018	1
Thamnolia vermicularis (Sw.) Schaer., 1850	2
Thelotrema lepadinum (Ach.) Ach., 1803	2
Trachyderma gayanum (Mont.) Trevis., 1869	4
Umbilicaria antarctica Frey & I.M. Lamb, 1939	2
Umbilicaria cylindrica (L.) Delise, 1830	2
Umbilicaria decussata (Vill.) Zahlbr., 1932	1
Umbilicaria hyperborea (Ach.) Hoffm., 1796	1
Umbilicaria nylanderiana (Zahlbr.) H. Magn., 1937	2
Umbilicaria polyrrhiza (L.) Fr., 1825	2
Usnea acromelana Stirt., 1898	3
Usnea alectoroides Motyka, 1936	1
Usnea aurantiacoatra (Jacq.) Bory, 1781	1
Usnea cornuta Körb., 1859	1
Usnea Dill. ex Adans., 1763	4
Usnea dusenii Du Rietz, 1926	2
Usnea trachycarpa (Stirt.) Müll. Arg., 1889	1
Varicellaria velata (Turner) I. Schmitt & Lumbsch, 2012	2
Verrucaria porinopsis Nyl., 1883	1
Verrucaria Schrad., 1794	2
Xanthopsoroma contextum (Stirt.) Elvebakk, 2010	5
Xanthopsoroma soccatum (R. Br. ex Cromb.) Elvebakk, 2010	3
Xanthoria (Fr.) Th. Fr., 1861	2
